# Supplementary material for: Characterisation of a hydroxymandelate oxidase involved in the biosynthesis of two unusual amino acids occurring in the vancomycin group of antibiotics
Source: Royal Society of Chemistry journal article supplement (doi:10.1039/b103548g), 2001-01-01
Supplement: b103548g.doc [file b103548g.doc]

**Supplementary information**

|  |  |
| --- | --- |
| a | b |

(a) SDS-PAGE analysis of HmaO. Lane 1, cell culture before induction with IPTG; lane 2, cell culture after induction with IPTG; lane 3, cell pellet; lane 4, cell free extract; lane 5, eluent off Ni2+-NTA resin. (b) Molecular weight analysis of HmaO protein by ESI-MS.

GC trace and CI mass spectra of an enzyme reaction of 3,5DHMA with HmaO after derivatisation by diazomethan showing methylated 3,5-dihydroxyphenylglyoxylic acid (3,5DHPGA, product), and methylated 3,5-dihydroxymandelic acid (3,5DHMA, substrate).
